# Supplementary material for: Establishment of Bactrian Camel Induced Pluripotent Stem Cells and Prediction of Their Unique Pluripotency Genes
Source: MDPI journal article supplement (doi:10.3390/ijms24031917), 2023-01-18
Supplement: s1 [file s1]

## **Supplementary Information**

### **Establishment of Bactrian Camel Induced Pluripotent Stem Cells and Prediction of Their Unique Pluripotency Genes**

Zongshuai Li<sup>a,b</sup>, Yina Li<sup>a,b</sup>, Qiran Zhang<sup>b,c</sup>, Wenbo Ge<sup>d</sup>, Yong Zhang<sup>a, b,\*</sup>, Xingxu Zhao<sup>a, b</sup>, Junjie Hu<sup>a, b</sup>, Ligang Yuan<sup>a</sup>, Wangdong Zhang<sup>a</sup>

<sup>a</sup>College of Veterinary Medicine, Gansu Agricultural University, Lanzhou 730070, china

<sup>b</sup>Gansu Key Laboratory of Animal Generational Physiology and Reproductive Regulation, Gansu Agricultural University, Lanzhou 730070, china

<sup>c</sup>College of Life Science and technology, Gansu Agricultural University, Lanzhou 730070, china<sup>90</sup>

<sup>d</sup> Chinese Academy of Agricultural Sciences Lanzhou Institute of Husbandry and Pharmaceutical Sciences, Lanzhou 730070, China

\* Yong Zhang

Email: zhangyong@gsau.edu.cn

**Table S1-S7**

**Table S1. Primers used in the construction of pMXS-EGFP and corrected pMXS-SOX2**

| Gene             | Primer                                                      | Enzyme loci    | Annealing temp( °C) | Fragment size(bp) |
|------------------|-------------------------------------------------------------|----------------|---------------------|-------------------|
| <i>EGFP</i>      | TTTAAGCTTTTACTTGTACAGCTCGTCC<br>TAAGGATCCATGGTGAGCAAGGGCGAG | HidIII<br>BamI | 57                  | 738               |
| <i>EGFP-J</i>    | GGTGGGGTCTTTCATTCC<br>CGCCGACACCAGACTAAG                    |                | 57                  | 1006              |
| pMXC-F           | CCGCTCGAGTTTAAATAGTACA                                      | Xho I          | 57                  |                   |
| <i>Sox2-R1</i>   | TAAGGATCCCAGTGTGGTGGTACGGGA<br>AATCACAAGTTTG                | BamI           | 58                  | 1174              |
| <i>Sox2-R2</i>   | CACAAGTTTGTACAAAAAAGCAGGCTA<br>TGTATAACATGAT                |                | 58                  | 1144              |
| <i>Sox2-jian</i> | GGTGGGGTCTTTCATTCC<br>CGCCGACACCAGACTAAG                    |                | 57                  | 1430              |

**Table S2. The composition of 6 different culture protocols**

| Protocol | OSKG | M | Trophoblast | VTN-N | E8 | E8+LIF |
|----------|------|---|-------------|-------|----|--------|
| 1        | √    | √ | √           |       | √  |        |
| 2        | √    | √ | √           |       |    | √      |
| 3        | √    | √ |             | √     | √  |        |
| 4        | √    |   | √           |       | √  |        |
| 5        | √    |   | √           |       |    | √      |
| 6        | √    |   |             | √     | √  |        |

O: Pseudovirus of *Oct4* gene

S: Pseudovirus of *Sox2* gene

K: Pseudovirus of *Klf4* gene

M: Pseudovirus of c-*Myc* gene

G: Pseudovirus of *EGFP* gene

Trophoblast: Mouse embryo fibroblasts treated with mitomycin C

VTN-N: Vitronectin (VTN-N) Recombinant Human Protein, Truncated

E8:Essential 8™ medium

LIF: 1000 U/ml leukemia inhibitory factor

**Table S3. Primers used to detect endogenous genes and three germ layer genes**

| Gene                            | Primer                | Annealing temperature(°C) | Fragment size(bp) |
|---------------------------------|-----------------------|---------------------------|-------------------|
| <i>Endo Sox2</i>                | AGAGAACCCCAAGATGCACA  | 57                        | 104               |
|                                 | GCTTGGCCTCGTCGATAAAC  |                           |                   |
| <i>Endo Nanog</i>               | GATGCCTGGCGAATACTTCC  | 63                        | 329               |
|                                 | CTGCTGGGGACTGACATACT  |                           |                   |
| <i>FoxA2</i>                    | ACAACCTCATGTCCTCGGAG  | 60                        | 225               |
|                                 | TAATGGGTCGGGAGTACACC  |                           |                   |
| <i>MYOD1</i>                    | GGAGCTAGAGAGGACGAGCA  | 55                        | 172               |
|                                 | TCTCAAAGGCCTCGTTGACT  |                           |                   |
| <i>DES</i>                      | CCATCGCGGCTAAGAACATC  | 55                        | 184               |
|                                 | GAATCGTTGGTGCCCTTGAG  |                           |                   |
| <i>MYF5</i>                     | ACTTGCAAGGCTCAGACGAG  | 60                        | 165               |
|                                 | TGACCTTCTTCAGGCGTCTT  |                           |                   |
| <i>GFAP</i>                     | ACATTGAGAAGGTGCGCTTC  | 55                        | 190               |
|                                 | TGTGCCAGATTGTCCCTCTC  |                           |                   |
| <i>PAX6</i>                     | TCAGCACCAGTGTCTACCAG  | 55                        | 243               |
|                                 | AGGTATCATAACTCCGCCCCG |                           |                   |
| <i>TERT</i>                     | AGAAGCTAGTCTCCCTGGGA  | 57                        | 174               |
|                                 | CCATCAACCAGCACAGGAAC  |                           |                   |
| <i><math>\beta</math>-Actin</i> | CTGGACTTGGAGCAGGAGATG | 55                        | 234               |
|                                 | CACCGTGTTGGCGTAGAGG   |                           |                   |

**Table S4. Primers used to detect RNA-Seq sequencing data**

| Gene          | Primer               | Annealing temperature(°C) | Fragment size(bp) |
|---------------|----------------------|---------------------------|-------------------|
| <i>CCNB2</i>  | AGTACCTGAGGCAGCTTGAG | 53                        | 231               |
|               | GCAGAGCTGTAATCCCAACC |                           |                   |
| <i>CDC20</i>  | AGAATCAGCCCGAAAACAGC | 57                        | 220               |
|               | AGGGAAGGAATGTAACGGCA |                           |                   |
| <i>ICAM1</i>  | TGATACCCTCCGGATTGTGG | 56                        | 247               |
|               | ATTCTCCAGTCTACTCCGCG |                           |                   |
| <i>IFK67</i>  | CCGTCATACCCAGCAGTGAA | 56                        | 208               |
|               | CCTGGCGCTTTCTGGAATTT |                           |                   |
| <i>MMP9</i>   | GCAAACCAATCTCACCGACA | 53                        | 223               |
|               | GGTCAGAAATTTGCCACGT  |                           |                   |
| <i>PCNA</i>   | CGGACACCTTGGCACTAGTA | 56                        | 215               |
|               | CACCCCATCTTTTGCACAGG |                           |                   |
| <i>PLK1</i>   | CTCGACACGCCTTATCCTCT | 53                        | 206               |
|               | GGGCTAGCTCATCACCTTCA |                           |                   |
| <i>RRM2</i>   | TGCCTGCCTGATGTTCAAAC | 53                        | 182               |
|               | GCATAAGTCTGTCTGCCACG |                           |                   |
| <i>S100A4</i> | TTCCACAAGTACTCGGGCAA | 56                        | 242               |
|               | TTATCCGGGAAGCCTTCGAA |                           |                   |
| <i>TP3</i>    | GAGGACGCCAGTGGTAATCT | 56                        | 197               |
|               | AGCGGCTTCTTCTTTTGTGG |                           |                   |
| <i>VEGFC</i>  | CTCTCTCTCAAGGCCCAAA  | 53                        | 244               |
|               | GGGTCATCTCCAGCGTTAGA |                           |                   |
| <i>VIM</i>    | GATTCAGGAACAGCACGTCC | 56                        | 207               |
|               | TTGGATTCTTGCTTCGCCTG |                           |                   |

**Table S5. Inducible genes collection**

| Gene         | Author                           | Gene          | Author                                | Gene          | Author                          |
|--------------|----------------------------------|---------------|---------------------------------------|---------------|---------------------------------|
| <i>c-Myc</i> | Takahashi K et al <sup>[1]</sup> | <i>Sox15</i>  | Nakagawa M et al <sup>[2]</sup>       | <i>PAX1</i>   | Shu J et al <sup>[3]</sup>      |
| <i>L-Myc</i> | Nakagawa M et al <sup>[4]</sup>  | <i>Sox18</i>  | Nakagawa M et al <sup>[2]</sup>       | <i>GATA4</i>  | Shu J et al <sup>[3]</sup>      |
| <i>N-Myc</i> | Nakagawa M et al <sup>[4]</sup>  | <i>Rcor2</i>  | Yang P et al <sup>[5]</sup>           | <i>CEBPa</i>  | Shu J et al <sup>[3]</sup>      |
| <i>Glis1</i> | Maekawa M et al <sup>[6]</sup>   | <i>Obox1</i>  | Wu L et al <sup>[7]</sup>             | <i>HNF4a</i>  | Shu J et al <sup>[3]</sup>      |
| <i>Klf4</i>  | Takahashi K et al <sup>[1]</sup> | <i>GMNN</i>   | Shu J et al <sup>[3]</sup>            | <i>GRB2</i>   | Shu J et al <sup>[3]</sup>      |
| <i>Klf1</i>  | Lee B C et al <sup>[8]</sup>     | <i>TH2A</i>   | Toshie et al <sup>[9]</sup>           | <i>Tet1</i>   | Gao Y et al <sup>[10]</sup>     |
| <i>Klf2</i>  | Lee B C et al <sup>[8]</sup>     | <i>TH2B</i>   | Toshie et al <sup>[9]</sup>           | <i>Jhdm1b</i> | Liu J et al <sup>[11]</sup>     |
| <i>Klf5</i>  | Lee B C et al <sup>[8]</sup>     | <i>Oct4</i>   | Takahashi K et al <sup>[1]</sup>      | <i>Bmi1</i>   | Moon JH et al <sup>[12]</sup>   |
| <i>Esrrb</i> | Bo F et al <sup>[13]</sup>       | <i>Nr5a1</i>  | Heng J et al <sup>[14]</sup>          | <i>Sall4</i>  | Liu J et al <sup>[11]</sup>     |
| <i>Bmp4</i>  | Chen J et al <sup>[15]</sup>     | <i>Nr5a2</i>  | Heng J et al <sup>[14]</sup>          | <i>Dppa2</i>  | Buganim Y et al <sup>[16]</sup> |
| <i>Nanog</i> | Yu J et al <sup>[17]</sup>       | <i>CDH1</i>   | Redmer T et al <sup>[18]</sup>        | <i>Lrh1</i>   | Liu J et al <sup>[11]</sup>     |
| <i>Lin28</i> | Yu J et al <sup>[17]</sup>       | <i>TCL-1A</i> | Picano-Castro V et al <sup>[19]</sup> | <i>Jdp2</i>   | Liu J et al <sup>[11]</sup>     |
| <i>Sox2</i>  | Takahashi K et al <sup>[1]</sup> | <i>Brn4</i>   | Bar-Nur O et al <sup>[20]</sup>       | <i>Id1</i>    | Liu J et al <sup>[11]</sup>     |
| <i>Sox1</i>  | Nakagawa M et al <sup>[2]</sup>  | <i>GATA6</i>  | Shu J et al <sup>[3]</sup>            |               |                                 |
| <i>Sox3</i>  | Nakagawa M et al <sup>[2]</sup>  | <i>Sox7</i>   | Shu J et al <sup>[3]</sup>            |               |                                 |

**Table S6. Annotation information in the GO term and KEGG pathway where the induced gene is located**

| Database       | Detailed information                                                                                                                                                                                                                                                                                                                                                                                                                                                                                                                                                                                                                                                                                                                                                                                                                                                                                                                                                  |
|----------------|-----------------------------------------------------------------------------------------------------------------------------------------------------------------------------------------------------------------------------------------------------------------------------------------------------------------------------------------------------------------------------------------------------------------------------------------------------------------------------------------------------------------------------------------------------------------------------------------------------------------------------------------------------------------------------------------------------------------------------------------------------------------------------------------------------------------------------------------------------------------------------------------------------------------------------------------------------------------------|
| Pathway        | ko04550//Signaling pathways regulating pluripotency of stem cells<br>ko04390//Hippo signaling pathway<br>ko05200//Pathways in cancer<br>ko04350//TGF-beta signaling pathway<br>ko04218//Cellular senescence<br>ko05202//Transcriptional misregulation in cancers<br>ko04950//Maturity onset diabetes of the young<br>ko04934//Cushing syndrome                                                                                                                                                                                                                                                                                                                                                                                                                                                                                                                                                                                                                        |
| GO Component   | GO:0043231//intracellular membrane-bounded organelle<br>GO:0043232//intracellular non-membrane-bounded organelle<br>GO:0044451//nucleoplasm part<br>GO:0090575//RNA polymerase II transcription factor complex<br>GO:0044424//intracellular part                                                                                                                                                                                                                                                                                                                                                                                                                                                                                                                                                                                                                                                                                                                      |
| GO Function    | GO:0000982//transcription factor activity, RNA polymerase II core promoter proximal region sequence-specific binding<br>GO:0000977//RNA polymerase II regulatory region sequence-specific DNA binding<br>GO:0003712//transcription cofactor activity<br>GO:0046983//protein dimerization activity<br>GO:0003723//RNA binding<br>GO:0000976//transcription regulatory region sequence-specific DNA binding<br>GO:0008134//transcription factor binding<br>GO:0005515//protein binding<br>GO:0046914//transition metal ion binding<br>GO:0001071//nucleic acid binding transcription factor activity<br>GO:0043169//cation binding<br>GO:0000975//regulatory region DNA binding<br>GO:0003700//transcription factor activity, sequence-specific DNA binding<br>GO:0000981//RNA polymerase II transcription factor activity, sequence-specific DNA binding<br>GO:0003677//DNA binding<br>GO:0003676//nucleic acid binding<br>GO:0019904//protein domain specific binding |
| GO Process     | GO:0001101//response to acid chemical<br>GO:0006357//regulation of transcription from RNA polymerase II promoter<br>GO:0001708//cell fate specification<br>GO:0019827//stem cell population maintenance<br>GO:0008284//positive regulation of cell proliferation<br>GO:0003006//developmental process involved in reproduction<br>GO:0045597//positive regulation of cell differentiation<br>GO:0060795//cell fate commitment involved in formation of primary germ layer<br>GO:0008285//negative regulation of cell proliferation<br>GO:0008283//cell proliferation<br>GO:0042981//regulation of apoptotic process<br>GO:0006355//regulation of transcription, DNA-templated<br>GO:0043009//chordate embryonic development<br>GO:0010468//regulation of gene expression                                                                                                                                                                                              |
| No information | No information                                                                                                                                                                                                                                                                                                                                                                                                                                                                                                                                                                                                                                                                                                                                                                                                                                                                                                                                                        |

## References

- [1]Takahashi K, Yamanaka S. Induction of pluripotent stem cells from mouse embryonic and adult fibroblast cultures by defined factors [J]. *Cell*, 2006, 51(4): 2346-2351.
- [2]Nakagawa M, Koyanagi M, Tanabe K, et al. Generation of induced pluripotent stem cells without Myc from mouse and human fibroblasts [J]. *Nature Biotechnology*, 2008,
- [3]Shu J, Wu C, Wu Y, et al. Induction of Pluripotency in Mouse Somatic Cells with Lineage Specifiers [J]. *Cell*, 2015, 153(5): 963-975.
- [4]Nakagawa M, Takizawa N, Narita M, et al. Promotion of direct reprogramming by transformation-deficient Myc [J]. *Proceedings of the National Academy of Sciences of the United States of America*, 2010, 107(32): 14152-14157.
- [5]Yang P, Wang Y, Chen J, et al. RCOR2 Is a Subunit of the LSD1 Complex That Regulates ESC Property and Substitutes for SOX2 in Reprogramming Somatic Cells to Pluripotency [J]. *Stem Cells*, 2011, 29(5):
- [6]Maekawa M, Yamaguchi K, Nakamura T, et al. Direct reprogramming of somatic cells is promoted by maternal transcription factor Glis1 [J]. *Nature*, 2011 Jun 8, 474(7350): 225-229.
- [7]Wu L, Wu Y, Peng B, et al. Oocyte-Specific Homeobox 1, Obox1 , Facilitates Reprogramming by Promoting Mesenchymal-to-Epithelial Transition and Mitigating Cell Hyperproliferation [J]. *Stem Cell Reports*, 2017, 9(5):
- [8]Lee B C, Kim M K, Jang G, et al. Dogs cloned from adult somatic cells [J]. *Nature*, 2005, 436(7051): 641.
- [9]Toshie, Shinagawa, Tsuyoshi, et al. Histone Variants Enriched in Oocytes Enhance Reprogramming to Induced Pluripotent Stem Cells [J]. *Cell Stem Cell*, 2014, 14(2): 217-227.
- [10]Gao Y, Chen J, Li K, et al. Replacement of Oct4 by Tet1 during iPSC Induction Reveals an Important Role of DNA Methylation and Hydroxymethylation in Reprogramming [J]. *Cell Stem Cell*, 2013, 12(4): 453-469.
- [11]Liu J H Q, Peng T, Peng M, Wei B, Li D. The oncogene c-Jun impedes somatic cell reprogramming [J]. *Nat Cell Biol*, 2015, 17(7): 856-867.
- [12]Moon JH H J, Kim JS, Jun EK, Lee JH, Kim A, et al. Reprogramming fibroblasts into induced pluripotent stem cells with Bmi1 [J]. *Cell Research*, 2011, 21(9): 1305-1315.
- [13]Bo F, Jiang J, Kraus P, et al. Reprogramming of fibroblasts into induced pluripotent stem cells with orphan nuclear receptor Esrrb [J]. *Nature Cell Biology*, 2009, 11(2): 197-203.
- [14]Heng J, Feng B, Han J, et al. The nuclear receptor Nr5a2 can replace Oct4 in the reprogramming of murine somatic cells to pluripotent cells [J]. *Cell Stem Cell*, 2010, 6(2): 167-174.



- [15]Chen J, Liu J, Yang J, et al. BMPs functionally replace Klf4 and support efficient reprogramming of mouse fibroblasts by Oct4 alone [J]. *Cell Research*, 2011, 21(1): 205-212.
- [16]Buganim Y, Faddah D, Cheng A, et al. Single-Cell Expression Analyses during Cellular Reprogramming Reveal an Early Stochastic and a Late Hierarchic Phase [J]. *Cell*, 2012, 150(6): 1209-1222.
- [17]Yu J, Vodyanik M A, Smuga-Otto K, et al. Induced Pluripotent Stem Cell Lines Derived from Human Somatic Cells [J]. *Science*, 2007, 318(5858): 1917–1920.
- [18]Redmer T, Diecke S, Grigoryan T, et al. E-cadherin is crucial for embryonic stem cell pluripotency and can replace OCT4 during somatic cell reprogramming [J]. *Embo Reports*, 2011, 12(7): 720-726.
- [19]Picano-Castro V, Russo-Carbolante E, Reis L, et al. Pluripotent reprogramming of fibroblasts by lentiviral mediated insertion of SOX2, C-MYC, and TCL-1A [J]. *Stem Cells & Development*, 2011, 20(1): 169-180.
- [20]Bar-Nur O, Verheul C, Sommer A G, et al. Lineage conversion induced by pluripotency factors involves transient passage through an iPSC stage [J]. *Nature Biotechnology*, 2015, 33(7): 761-768.
